# Supplementary material for: Novel NK1R-Targeted 68Ga-/177Lu-Radioconjugates with Potential Application against Glioblastoma Multiforme: Preliminary Exploration of Structure–Activity Relationships
Source: Int J Mol Sci. 2022 Jan 21;23(3):1214. doi: 10.3390/ijms23031214 (PMC8835841; doi:10.3390/ijms23031214)
Supplement: Supplementary file 1 [file ijms-23-01214-s001.zip › ijms-1509924-supplementary.pdf]

## Supplementary Materials

to

### **Novel NK1R-targeted $^{68}\text{Ga}$ -/ $^{177}\text{Lu}$ -radioconjugates with potential application against glioblastoma multiforme: preliminary exploration of Structure-Activity Relationship**

by

Joanna Matalińska,<sup>1,†</sup> Katarzyna Kosińska,<sup>1,†</sup> Paweł K. Halik,<sup>2</sup> Przemysław Koźmiński,<sup>2</sup> Piotr F. J. Lipiński,<sup>1,\*</sup> Ewa Gniazdowska,<sup>2</sup> Aleksandra Misicka<sup>1,3,\*</sup>

1 Department of Neuropeptides, Mossakowski Medical Research Institute Polish Academy of Sciences, 5 Pawińskiego Street, PL 02-106, Warsaw, Poland; jmatalinska@imdik.pan.pl (J.M.), kkosinska@imdik.pan.pl (K.K.), plipinski@imdik.pan.pl (P.F.J.L.), misicka@chem.uw.edu.pl (A.M.).

2 Centre of Radiochemistry and Nuclear Chemistry, Institute of Nuclear Chemistry and Technology, 03-195 Warsaw, Poland; p.halik@ichtj.waw.pl (P.K.H.); p.kozminski@ichtj.waw.pl (P.K.); e.gniazdowska@ichtj.waw.pl (E.G.).

3 University of Warsaw, Faculty of Chemistry, 1 Pasteura Street PL 02-093, Warsaw, Poland; misicka@chem.uw.edu.pl (A.M.).

\* Correspondence: plipinski@imdik.pan.pl (P.F.J.L.), misicka@chem.uw.edu.pl (A.M.).

† these authors contributed equally

## Table of contents

---

### SM-SYN: synthesis

---

<sup>13</sup>C-NMR spectrum of **4b**:HCl.

<sup>13</sup>C-NMR spectrum of **5b**:HCl

---

### SM-STAB: stability

---

**Figure SM-STAB-1.** γ-radiochromatograms of [<sup>68</sup>Ga]**Ga-2d** incubated with human serum at 1h, 2h and 4.5 h time points.

**Figure SM-STAB-2.** γ-radiochromatograms of [<sup>177</sup>Lu]**Lu-2d** incubated with human serum at 1d and 2d time points.

---

### SM-MOD: modelling

---

**Figure SM-MOD-1.** RMSD plot of the ligand position in the simulations of **1c**/hNK1R complexes.

**Figure SM-MOD-2.** RMSD plot of the 3,5-bistrifluoromethylbenzyl fragment's position in the simulations of **1c**/hNK1R complexes.

**Figure SM-MOD-3.** RMSD plot of the indole ring's position in the simulations of **1c**/hNK1R complexes.

**Figure SM-MOD-4.** Superposition of **1c** (L732,138) in its supposed bioactive conformation (as found in MD simulations with the receptor) and of (5*S*)-3-[[3,5-bis(trifluoromethyl)phenyl]methyl]-5-(1*H*-indol-3-ylmethyl)oxazolidine-2,4-dione.

**Figure SM-MOD-5.** Superposition of the binding pose found for **1d** (pink) by docking to a rigid receptor and that for **1c** (white).

**Figure SM-MOD-6.** RMSD plot of the ligand position in the simulations of **1d**/hNK1R complexes.

**Figure SM-MOD-7.** RMSD plot of the 3,5-bistrifluoromethylbenzyl fragment's position in the simulations of **1d**/hNK1R complexes.

**Figure SM-MOD-8.** RMSD plot of the indole ring's position in the simulations of **1d**/hNK1R complexes.

**Figure SM-MOD-9.** RMSD plot of the DOTA fragment's position in the simulations of **1d**/hNK1R complexes.

**Figure SM-MOD-10.** Scheme of the interactions of **1d** with the NK1R as found in the MD simulations (simulation **1d-1**, T = 150.0 ns).

**Figure SM-MOD-11.** Scheme of the interactions of **1d** with the NK1R as found in the MD simulations (simulation **1d-2**, T = 150.0 ns).

**Figure SM-MOD-12.** Scheme of the interactions of **1d** with the NK1R as found in the MD simulations (simulation **1d-3**, T = 150.0 ns).

**Figure SM-MOD-13.** RMSD plot of the ligand position in the simulations of **5a**/hNK1R complexes.

**Figure SM-MOD-14.** RMSD plot of the 3,5-bistrifluoromethylbenzyl fragment's position in the simulations of **5a**/hNK1R complexes.

**Figure SM-MOD-15.** RMSD plot of the indole ring's position in the simulations of **5a**/hNK1R complexes.

**Figure SM-MOD-16.** RMSD plot of the Boc-Ahx-Ahx fragment's position in the simulations of **5a**/hNK1R complexes.

**Figure SM-MOD-17.** RMSD plot of the -Ahx1- (closer to Trp) fragment's position in the simulations of **5a**/hNK1R complexes.

**Figure SM-MOD-18.** RMSD plot of the -Ahx2- (N-terminal) fragment's position in the simulations of **5a**/hNK1R complexes.

**Figure SM-MOD-19.** Scheme of the interactions of **5a** with the NK1R as found in the MD simulations (simulation **5a-1**, T = 210.0 ns).

**Figure SM-MOD-20.** Scheme of the interactions of **5a** with the NK1R as found in the MD simulations (simulation **5a-2**, T = 210.0 ns).

**Figure SM-MOD-21.** Scheme of the interactions of **5a** with the NK1R as found in the MD simulations (simulation **5a-3**, T = 210.0 ns).

**Figure SM-MOD-22.** RMSD plot of the ligand position in the simulations of **5b**/hNK1R complexes.

**Figure SM-MOD-23.** RMSD plot of the 3,5-bistrifluoromethylbenzyl fragment's position in the simulations of **5b**/hNK1R complexes.

**Figure SM-MOD-24.** RMSD plot of the indole ring's position in the simulations of **5b**/hNK1R complexes.

**Figure SM-MOD-25.** RMSD plot of the NH<sub>2</sub>-Ahx-Ahx- fragment's position in the simulations of **5b**/hNK1R complexes.

**Figure SM-MOD-26.** RMSD plot of the -Ahx1- (closer to Trp) fragment's position in the simulations of **5b**/hNK1R complexes.

**Figure SM-MOD-27.** RMSD plot of the -Ahx2- (N-terminal) fragment's position in the simulations of **5b**/hNK1R complexes.

**Figure SM-MOD-28.** Scheme of the interactions of **5b** with the NK1R as found in the MD simulations (simulation **5b-1**, T = 250.0 ns).

**Figure SM-MOD-29.** Scheme of the interactions of **5b** with the NK1R as found in the MD simulations (simulation **5b-2**, T = 250.0 ns).

**Figure SM-MOD-30.** Scheme of the interactions of **5b** with the NK1R as found in the MD simulations (simulation **5b-3**, T = 250.0 ns).

**Figure SM-MOD-31.** Compound **5b** in the hNK1R binding pocket. A snapshot from 5b-1 MD simulation (t=247.1 ns).

**Figure SM-MOD-32.** Compound **5b** in the hNK1R binding pocket. A snapshot from 5b-2 MD simulation (t=251.6 ns).

**Figure SM-MOD-33.** Compound **5b** in the hNK1R binding pocket. A snapshot from 5b-3 MD simulation (t=236.0 ns).

## SM-SYN: Synthesis

TFA anions of **4b** and **5b** were exchanged for chloride anions to give hydrochlorides **4b:HCl** and **5b:HCl**. This was done by dissolving samples in 0.1 M<sub>aq</sub> hydrochloric acid and lyophilization. The procedure was repeated thrice.

### 4b:HCl

<sup>13</sup>C NMR (150 MHz, DMSO-*d*<sub>6</sub>) δ (ppm), 172.76, 172.42, 140.01, 136.53, 130.7 (q, <sup>2</sup>*J*<sub>CF</sub> ~ 32.5 Hz), 128.64 (likely an unresolved quartet with <sup>3</sup>*J*<sub>CF</sub> ~ 4Hz), 127.42, 124.18, 123.68 (q, <sup>1</sup>*J*<sub>CF</sub> ~ 272 Hz), 121.39, 122.06 (likely an unresolved quartet with <sup>3</sup>*J*<sub>CF</sub> ~ 4Hz), 118.81, 118.29, 111.92, 109.85, 64.73, 53.85, 38.99, 35.06, 27.27, 27.14, 25.82, 24.97.

### 5b:HCl

<sup>13</sup>C NMR (150 MHz, DMSO-*d*<sub>6</sub>) δ (ppm), 172.91, 172.40, 172.15, 139.97, 136.53, 130.71 (q, <sup>1</sup>*J*<sub>CF</sub> ~ 32.5 Hz), 128.63 (likely an unresolved quartet with <sup>3</sup>*J*<sub>CF</sub> ~ 4Hz), 127.42, 124.15, 123.69 (q, <sup>1</sup>*J*<sub>CF</sub> ~ 272 Hz), 122.04 (likely an unresolved quartet with <sup>3</sup>*J*<sub>CF</sub> ~ 4Hz), 121.38, 118.80, 118.28, 111.92, 109.87, 64.72, 53.85, 39.04, 38.72, 35.54, 35.27, 27.16, 29.36, 27.25, 26.43, 25.95, 25.24. C<sub>ε</sub> signal of one of the Ahx residues overlapped by the DMSO-*d*<sub>6</sub> signal at around 40 ppm.

## SM-STAB: Stability

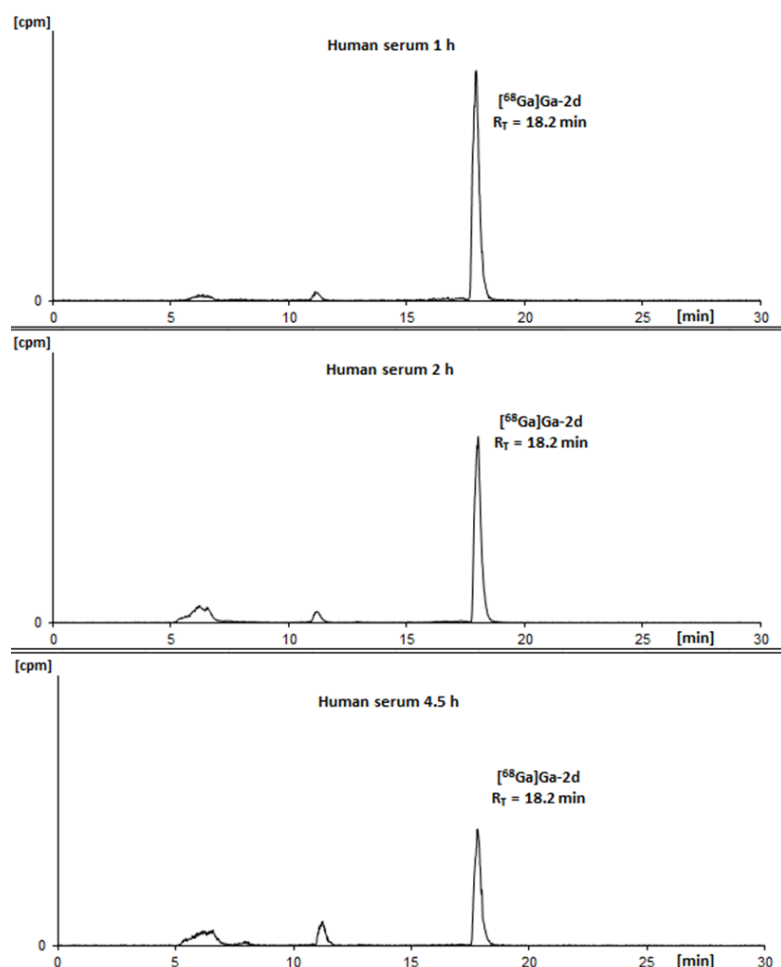

**Figure SM-STAB-1.** γ-radiochromatograms of [<sup>68</sup>Ga]Ga-2d incubated with human serum at 1h, 2h and 4.5 h time points.

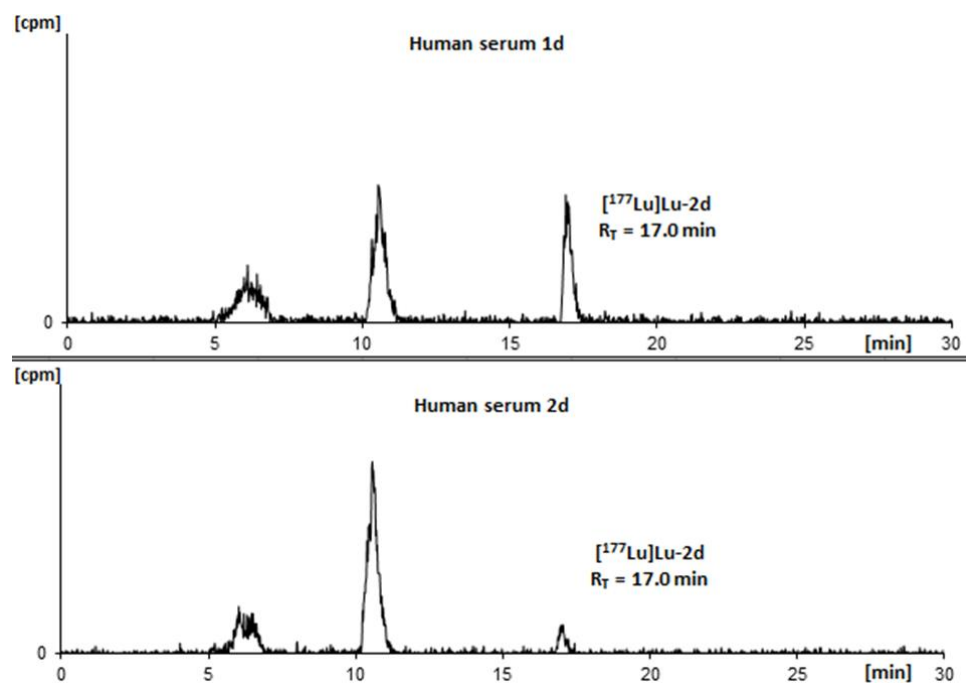

**Figure SM-STAB-2.**  $\gamma$ -radiochromatograms of [<sup>177</sup>Lu]Lu-2d incubated with human serum at 1d and 2d time points.

# SM-MOD: Molecular Modelling

## Compound 1c

### Ligand's position

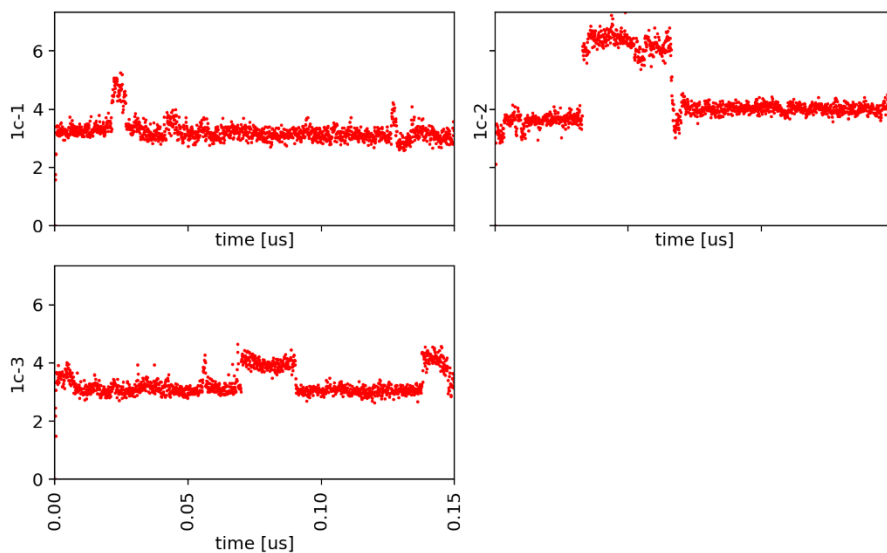

**Figure SM-MOD-1.** RMSD plot of the ligand position in the simulations of 1c/hNK1R complexes.

*RMSD is given in Angstroms.*

### 3,5-bistrifluoromethylbenzyl fragment's position

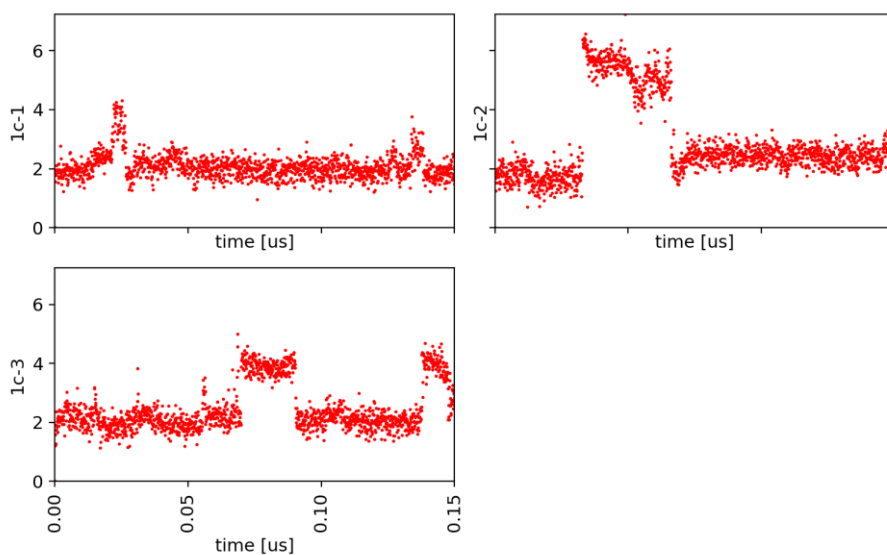

**Figure SM-MOD-2.** RMSD plot of the 3,5-bistrifluoromethylbenzyl fragment's position in the simulations of 1c/hNK1R complexes.

*RMSD is given in Angstroms.*

### Indole ring's position

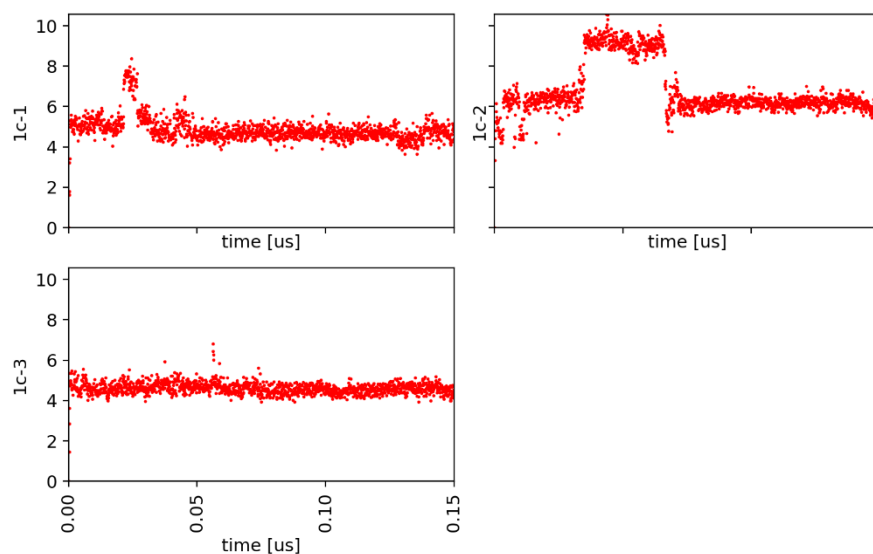

**Figure SM-MOD-3.** RMSD plot of the indole ring's position in the simulations of 1c/hNK1R complexes.

*RMSD is given in Angstroms.*

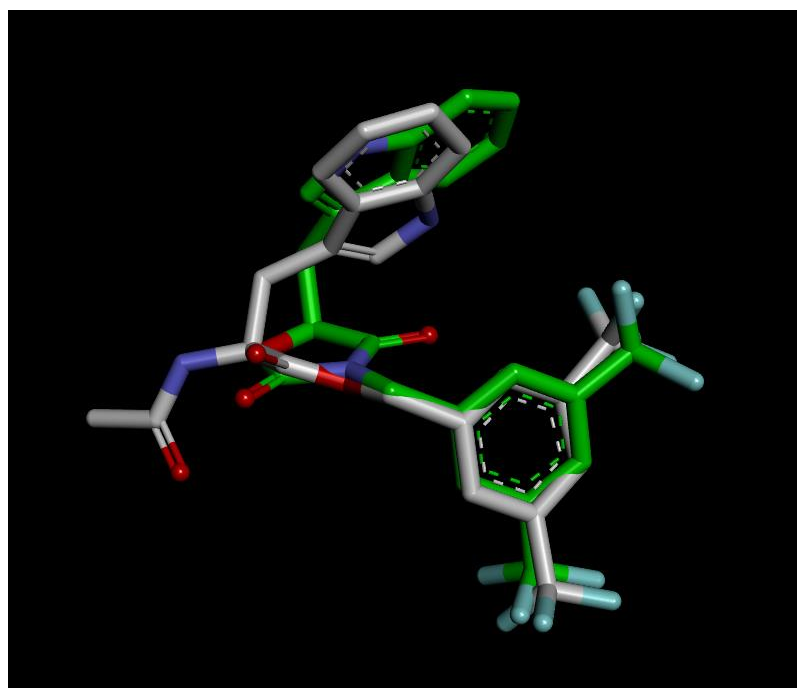

**Figure SM-MOD-4.** Superposition of **1c** (L732,138) in its supposed bioactive conformation (as found in MD simulations with the receptor) and of (5*S*)-3-[[3,5-bis(trifluoromethyl)phenyl]methyl]-5-(1*H*-indol-3-ylmethyl)oxazolidine-2,4-dione.

*The rigidified derivative was described in: A. M. MacLeod, M. A. Cascieri, K. J. Merchant, S. Sadowski, S. Hardwicke, R. T. Lewis, D. E. MacIntyre, J. M. Metzger and T. M. Fong, J. Med. Chem., 1995, 38, 934–941.*

## Compound 1d

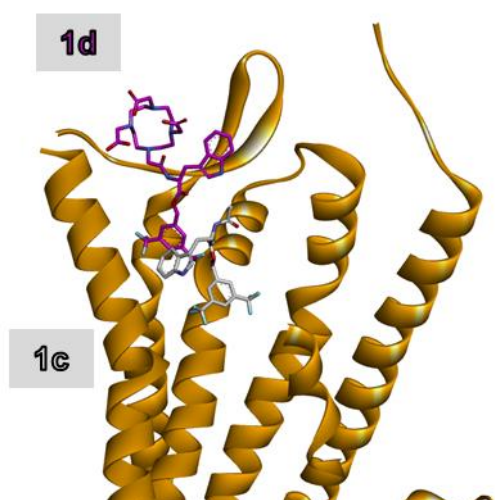

**Figure SM-MOD-5.** Superposition of the binding pose found for **1d** (pink) by docking to a rigid receptor and that for **1c** (white).

*We would suspect such displaced positioning of the 3,5-bistrifluoromethylphenyl core to be associated with diminished binding affinity which is contrary to the experimental results.*

## Ligand's position

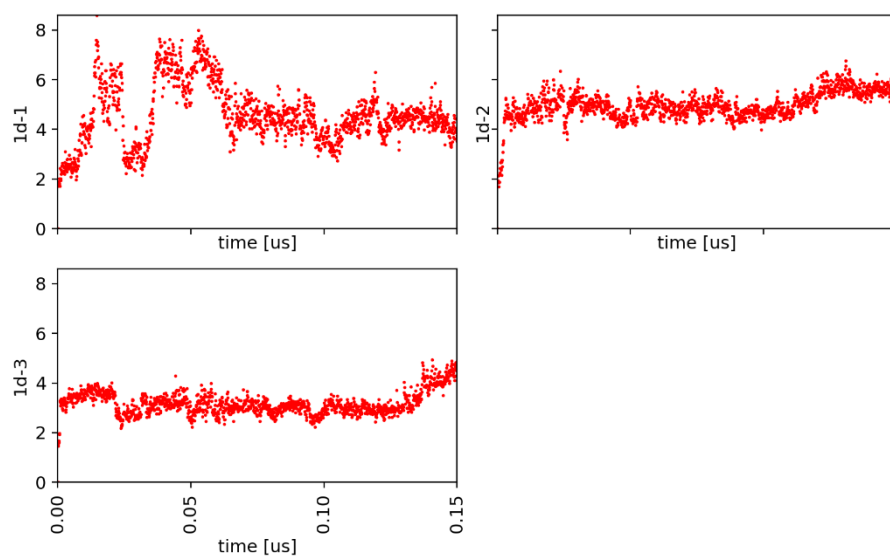

**Figure SM-MOD-6.** RMSD plot of the ligand position in the simulations of 1d/hNK1R complexes.

*RMSD is given in Angstroms.*

### 3,5-bistrifluoromethylbenzyl fragment's position

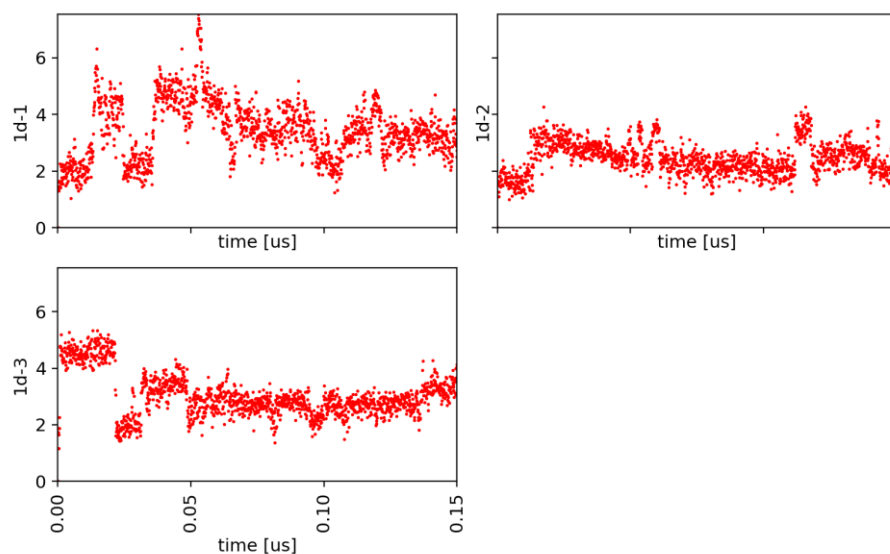

**Figure SM-MOD-7.** RMSD plot of the 3,5-bistrifluoromethylbenzyl fragment's position in the simulations of 1d/hNK1R complexes.

*RMSD is given in Angstroms.*

### Indole ring's position

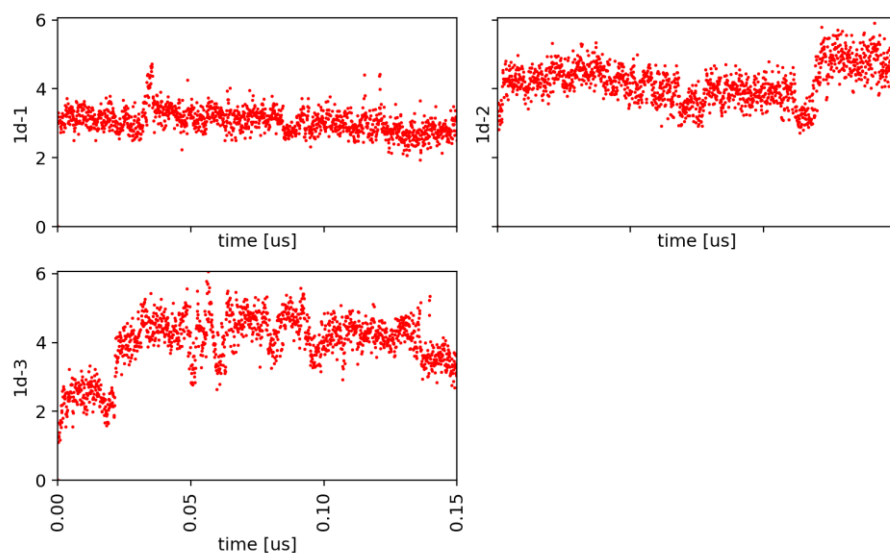

**Figure SM-MOD-8.** RMSD plot of the indole ring's position in the simulations of 1d/hNK1R complexes.

*RMSD is given in Angstroms.*

## DOTA fragment's position

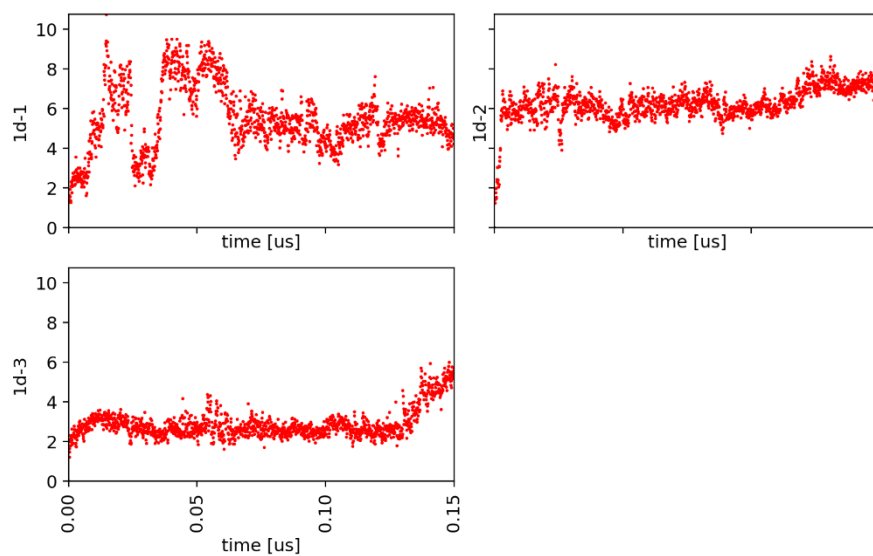

**Figure SM-MOD-9.** RMSD plot of the DOTA fragment's position in the simulations of 1d/hNK1R complexes.

*RMSD is given in Angstroms.*

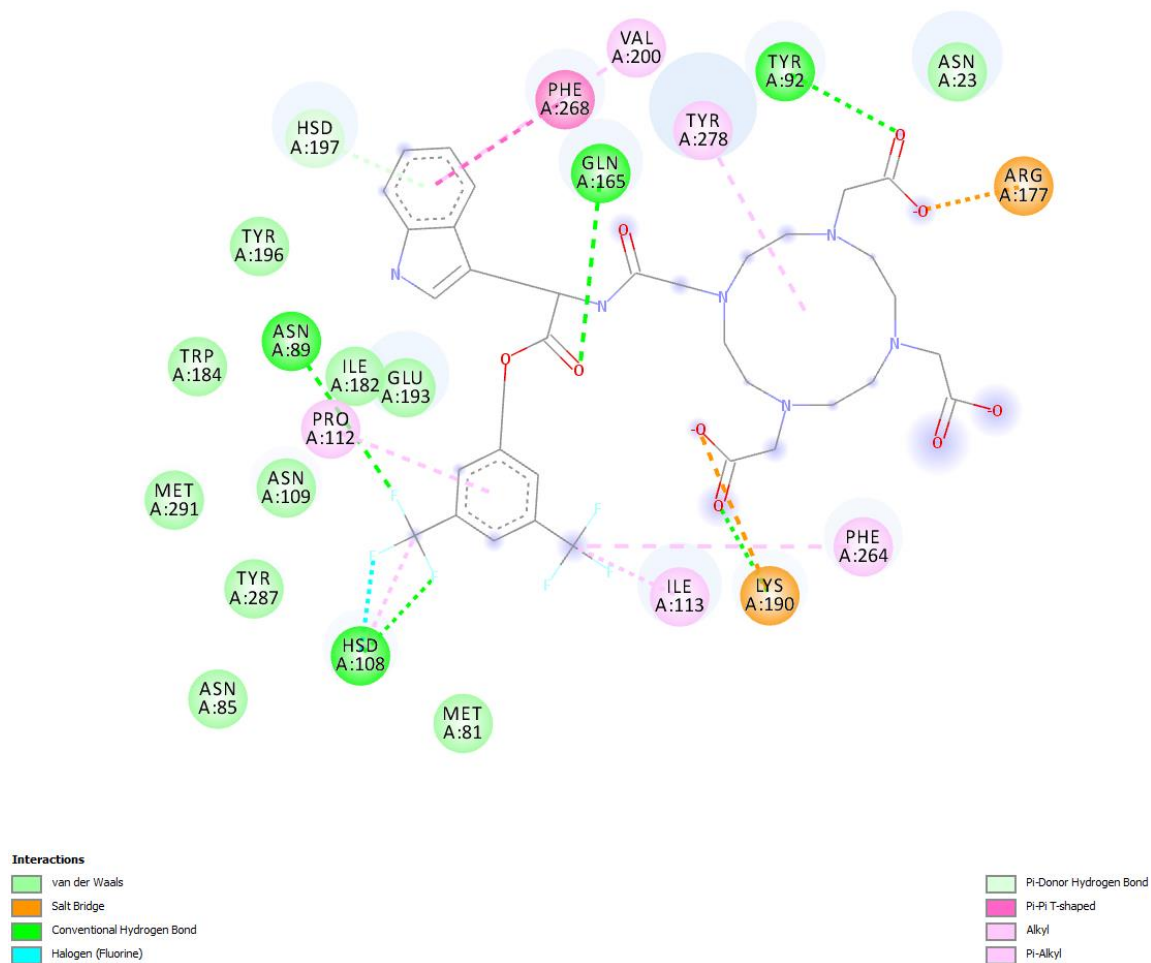

**Figure SM-MOD-10.** Scheme of the interactions of **1d** with the NK1R as found in the MD simulations (simulation **1d-1**, T = 150.0 ns). The interaction types are shown by colours as described in the legend.

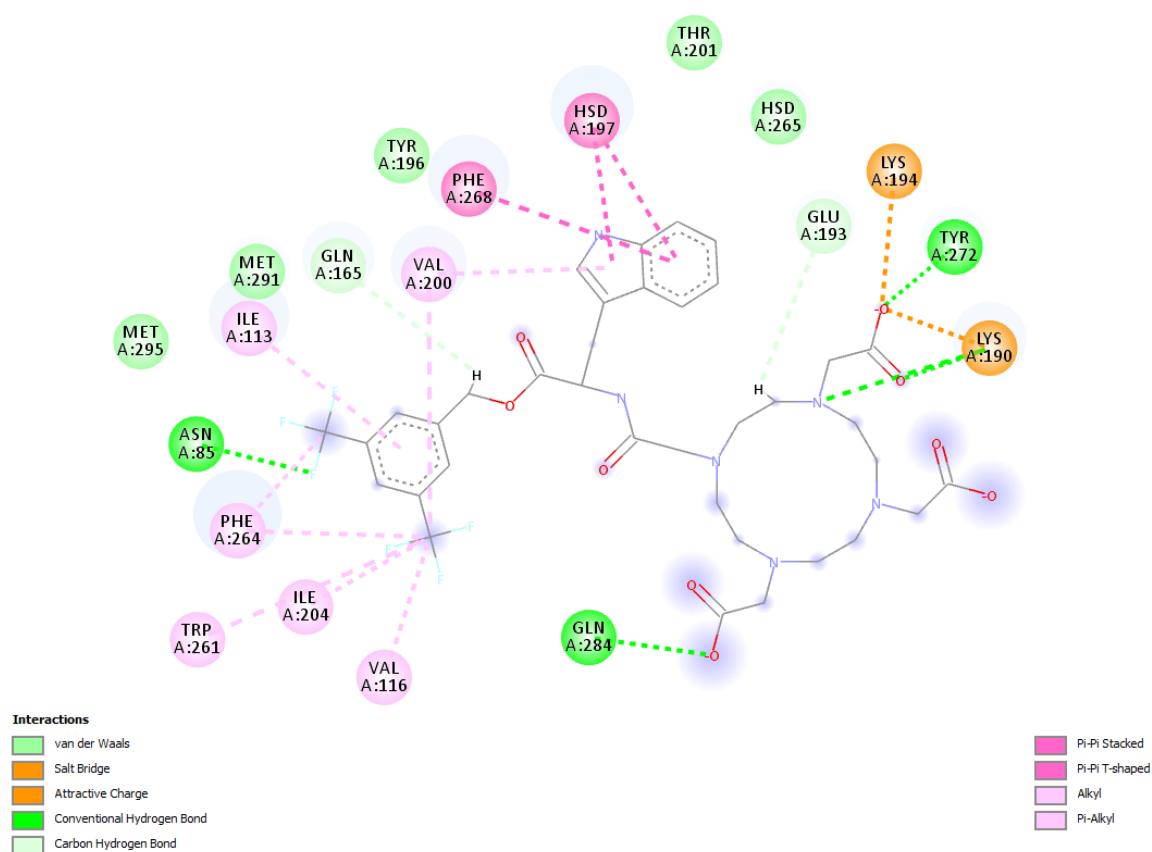

**Figure SM-MOD-11.** Scheme of the interactions of **1d** with the NK1R as found in the MD simulations (simulation **1d-2**, T = 150.0 ns). The interaction types are shown by colours as described in the legend.

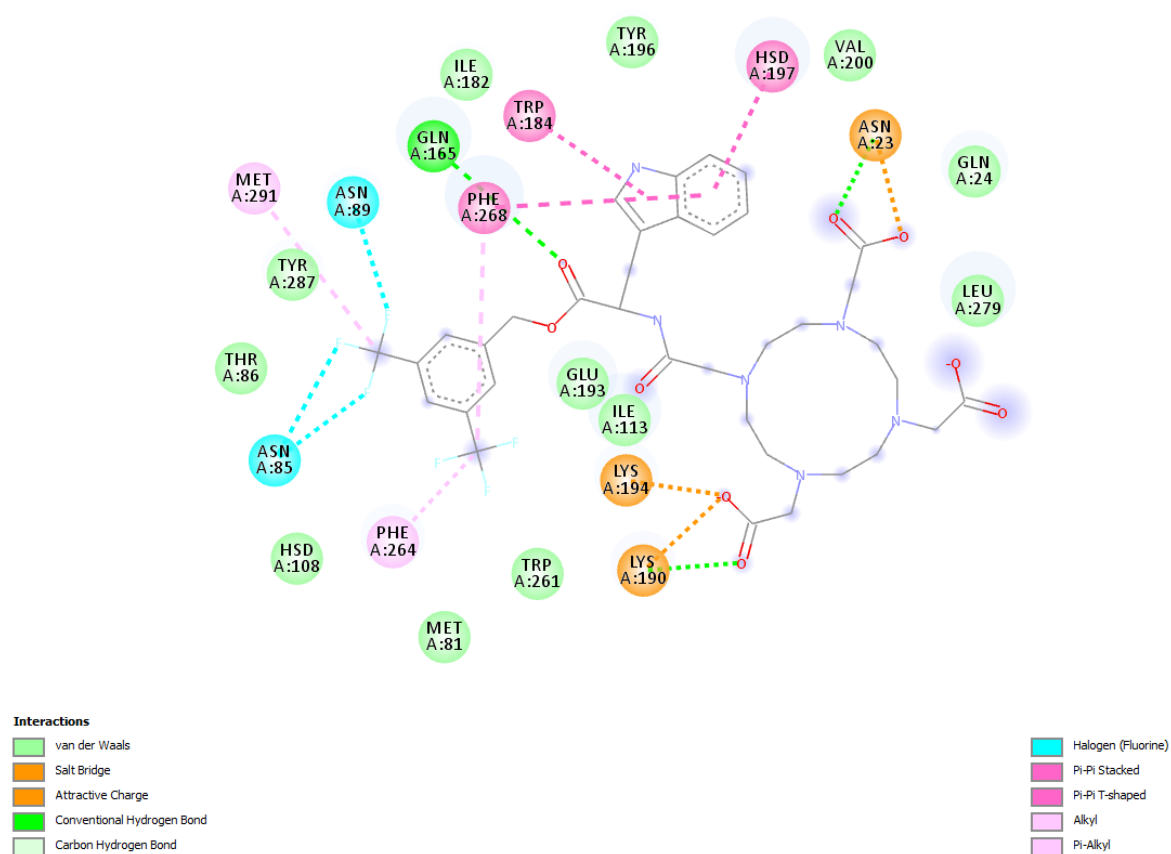

**Figure SM-MOD-12.** Scheme of the interactions of **1d** with the NK1R as found in the MD simulations (simulation **1d-3**, T = 150.0 ns). The interaction types are shown by colours as described in the legend.

## Compound 5a

### Ligand's position

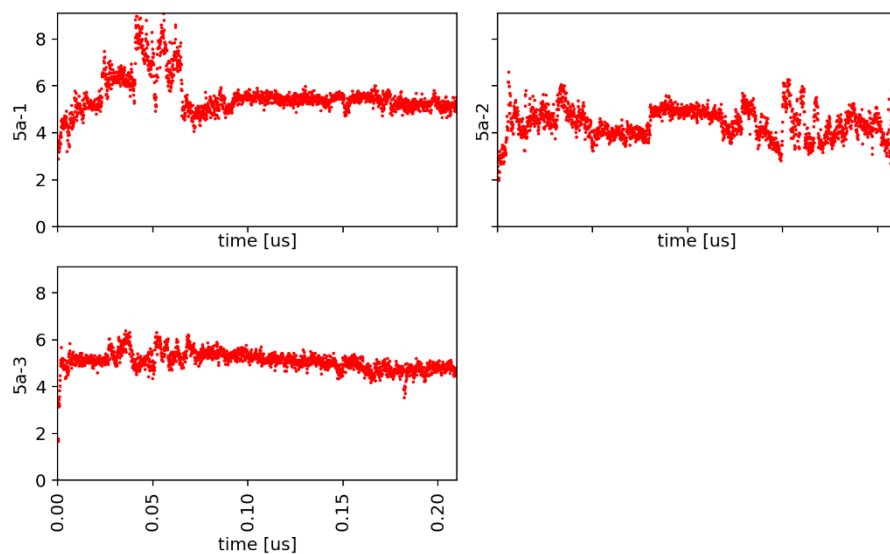

**Figure SM-MOD-13.** RMSD plot of the ligand position in the simulations of 5a/hNK1R complexes.

*RMSD is given in Angstroms.*

### 3,5-bistrifluoromethylbenzyl fragment's position

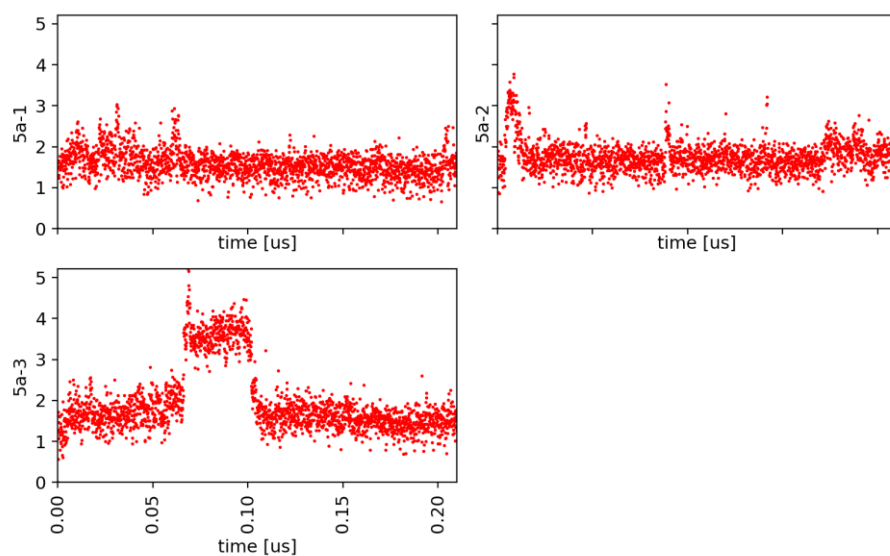

**Figure SM-MOD-14.** RMSD plot of the 3,5-bistrifluoromethylbenzyl fragment's position in the simulations of 5a/hNK1R complexes.

*RMSD is given in Angstroms.*

### Indole ring's position

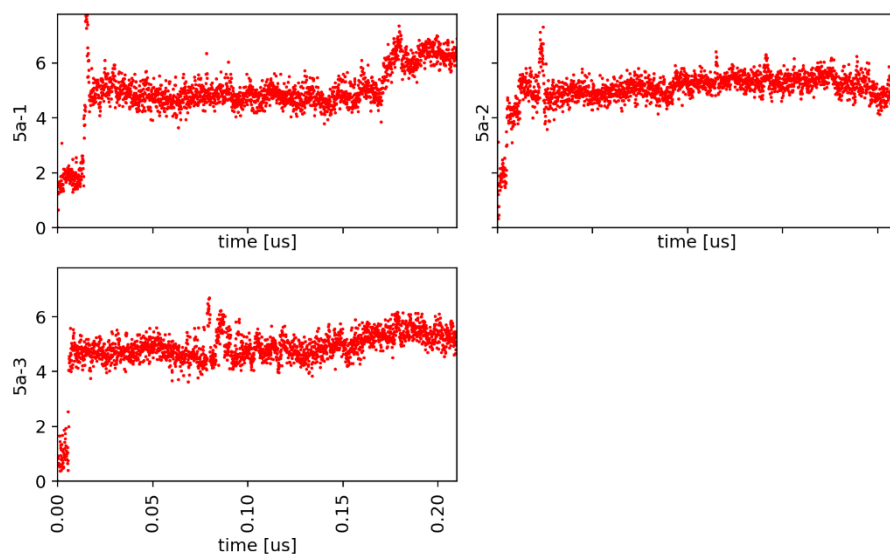

**Figure SM-MOD-15.** RMSD plot of the indole ring's position in the simulations of 5a/hNK1R complexes.

*RMSD is given in Angstroms.*

### Boc-Ahx-Ahx- fragment's position

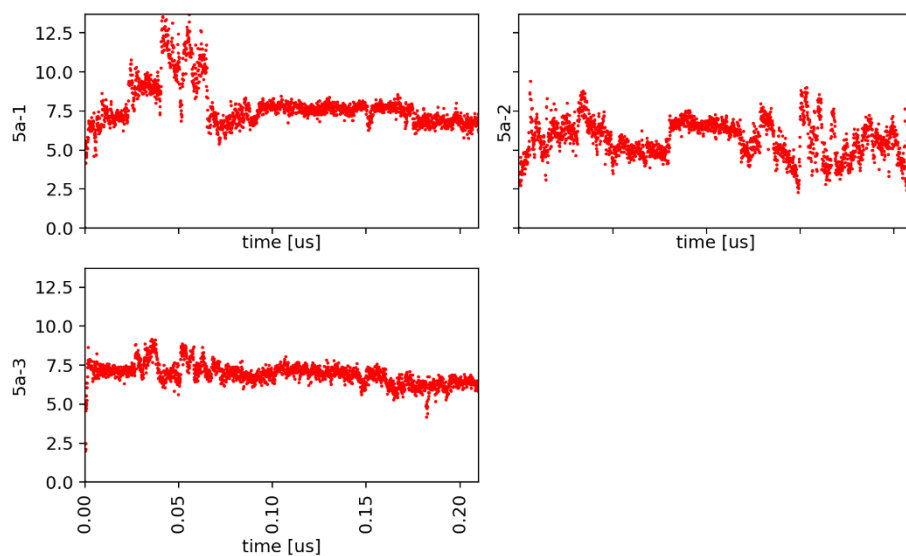

**Figure SM-MOD-16.** RMSD plot of the Boc-Ahx-Ahx fragment's position in the simulations of 5a/hNK1R complexes.

*RMSD is given in Angstroms.*

### **-Ahx1- (closer to Trp) fragment's position**

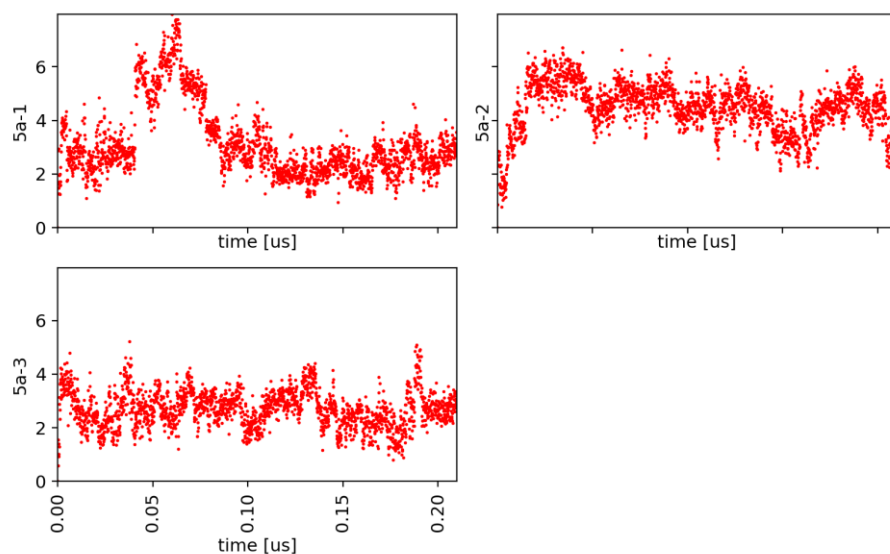

**Figure SM-MOD-17.** RMSD plot of the -Ahx1- (closer to Trp) fragment's position in the simulations of 5a/hNK1R complexes.

*RMSD is given in Angstroms.*

### **-Ahx2- (N-terminal) fragment's position**

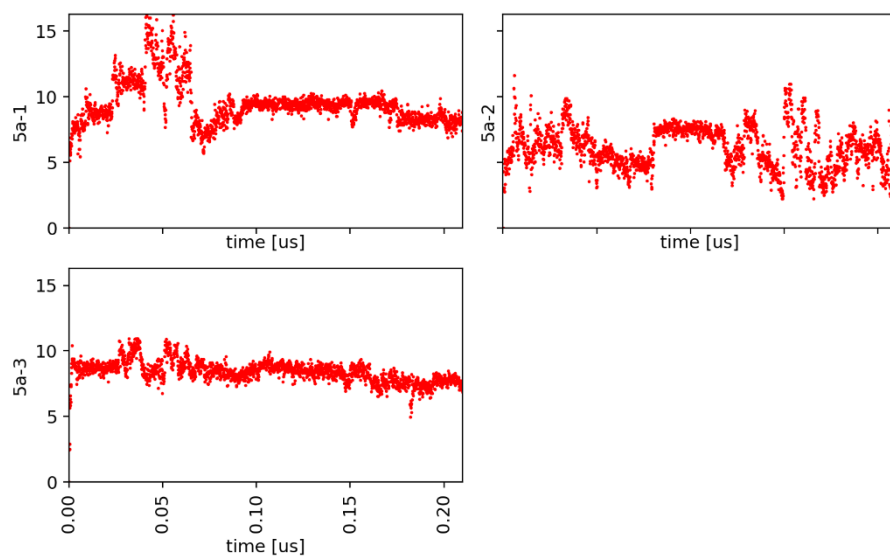

**Figure SM-MOD-18.** RMSD plot of the -Ahx2- (N-terminal) fragment's position in the simulations of 5a/hNK1R complexes.

*RMSD is given in Angstroms.*

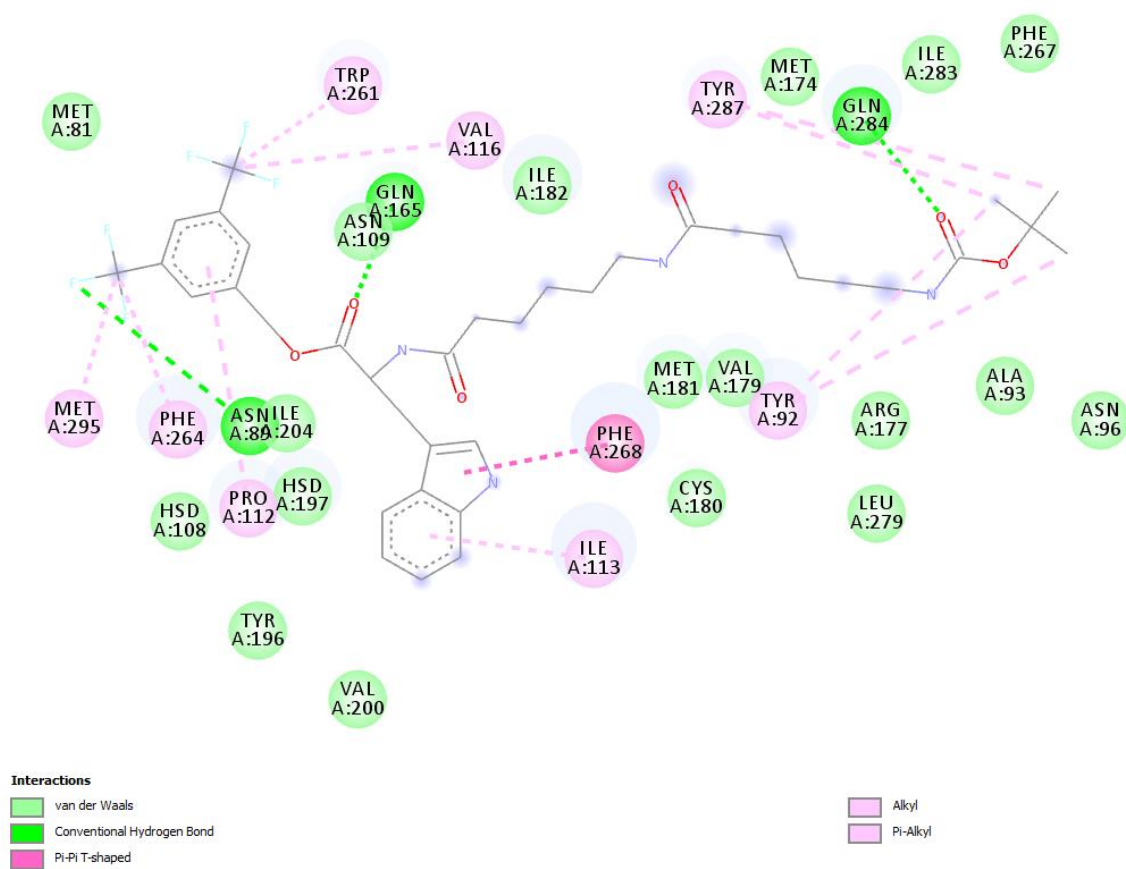

**Figure SM-MOD-19.** Scheme of the interactions of **5a** with the NK1R as found in the MD simulations (simulation **5a-1**, T = 210.0 ns). The interaction types are shown by colours as described in the legend.

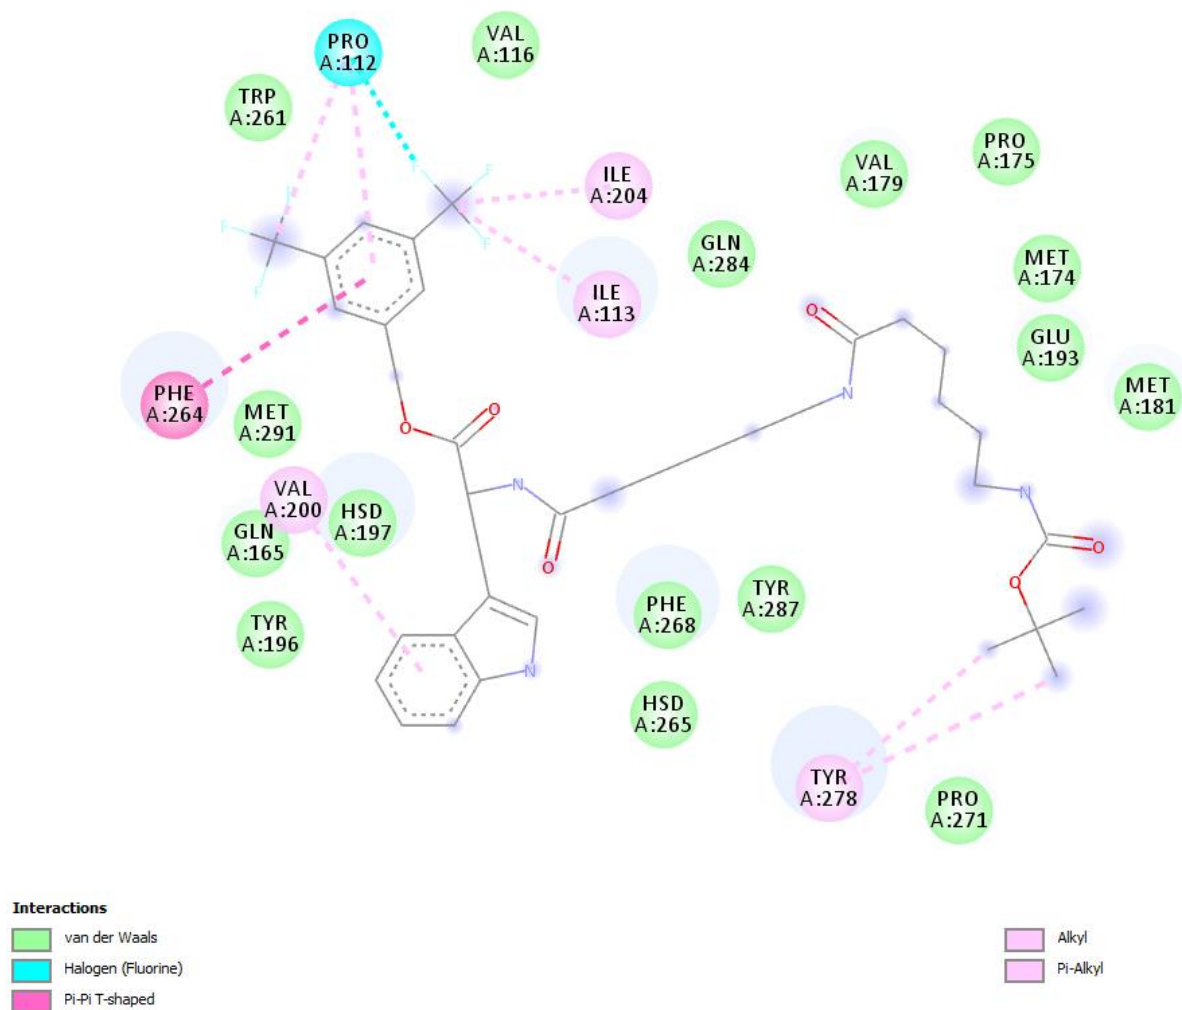

**Figure SM-MOD-20.** Scheme of the interactions of **5a** with the NK1R as found in the MD simulations (simulation **5a-2**, T = 210.0 ns). The interaction types are shown by colours as described in the legend.

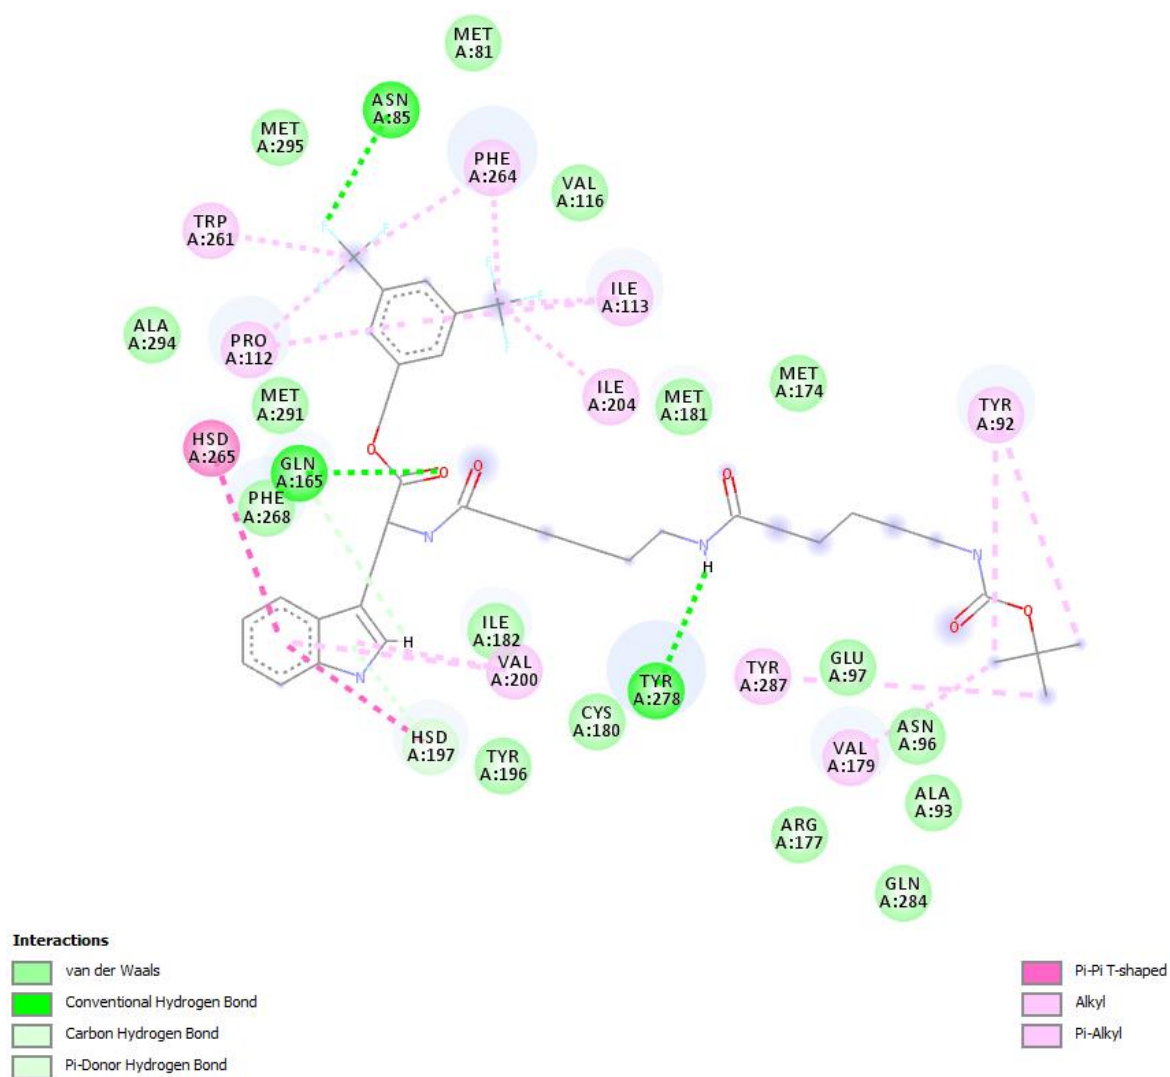

**Figure SM-MOD-21.** Scheme of the interactions of **5a** with the NK1R as found in the MD simulations (simulation **5a-3**, T = 210.0 ns). The interaction types are shown by colours as described in the legend.

## Compound 5b

### Ligand's position

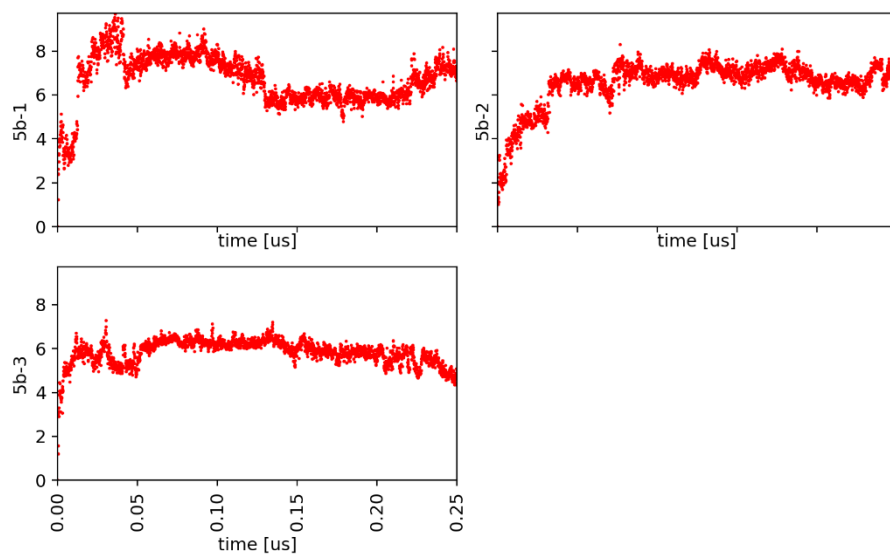

**Figure SM-MOD-22.** RMSD plot of the ligand position in the simulations of 5b/hNK1R complexes.

*RMSD is given in Angstroms.*

### 3,5-bistrifluoromethylbenzyl fragment's position

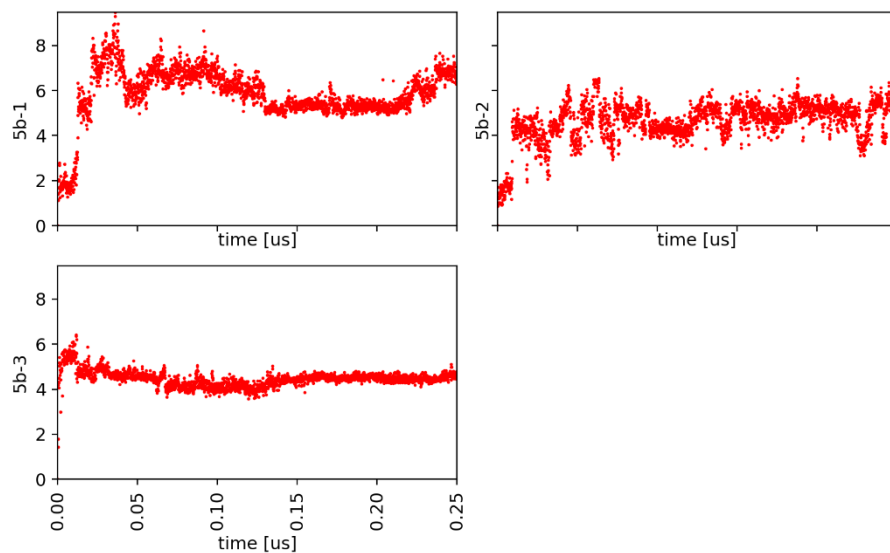

**Figure SM-MOD-23.** RMSD plot of the 3,5-bistrifluoromethylbenzyl fragment's position in the simulations of 5b/hNK1R complexes.

*RMSD is given in Angstroms.*

### Indole ring's position

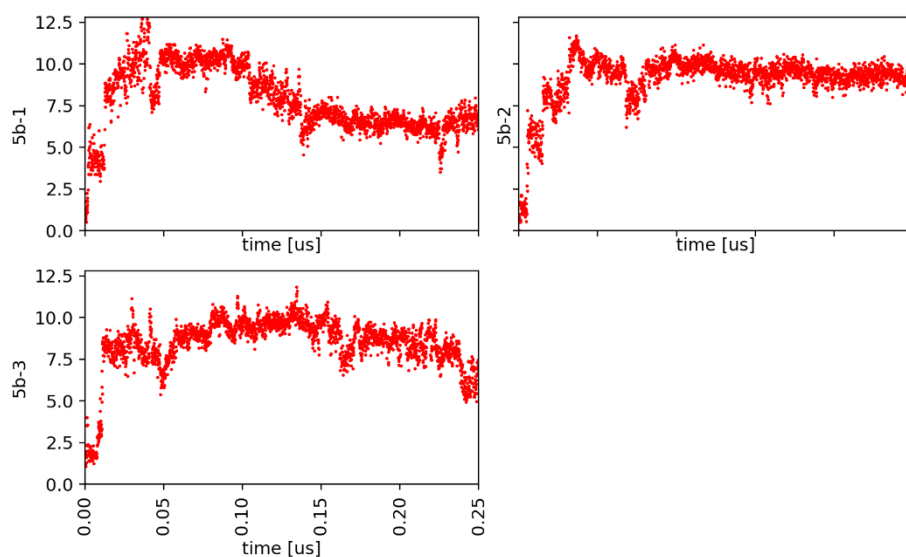

**Figure SM-MOD-24.** RMSD plot of the indole ring's position in the simulations of 5b/hNK1R complexes.

*RMSD is given in Angstroms.*

### NH<sub>2</sub>-Ahx-Ahx- fragment's position

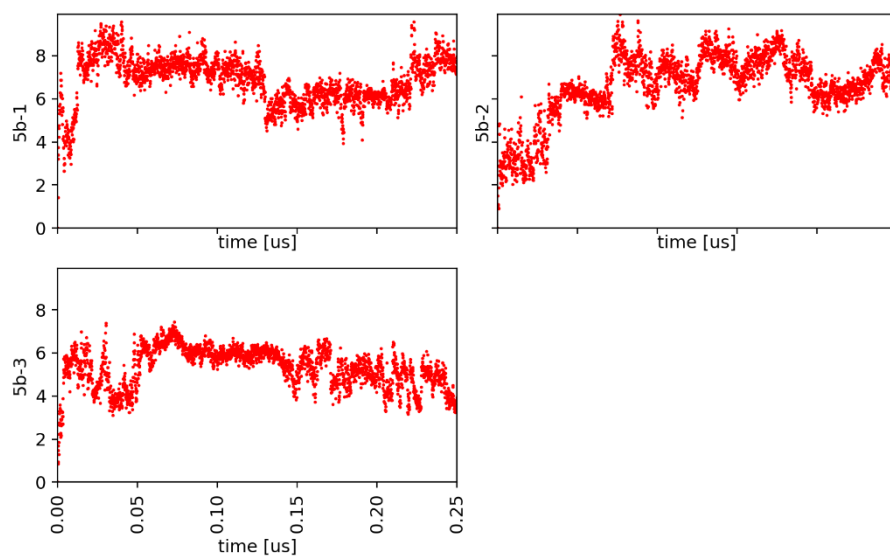

**Figure SM-MOD-25.** RMSD plot of the NH<sub>2</sub>-Ahx-Ahx- fragment's position in the simulations of 5b/hNK1R complexes.

*RMSD is given in Angstroms.*

**-Ahx1- (closer to Trp) fragment's position**

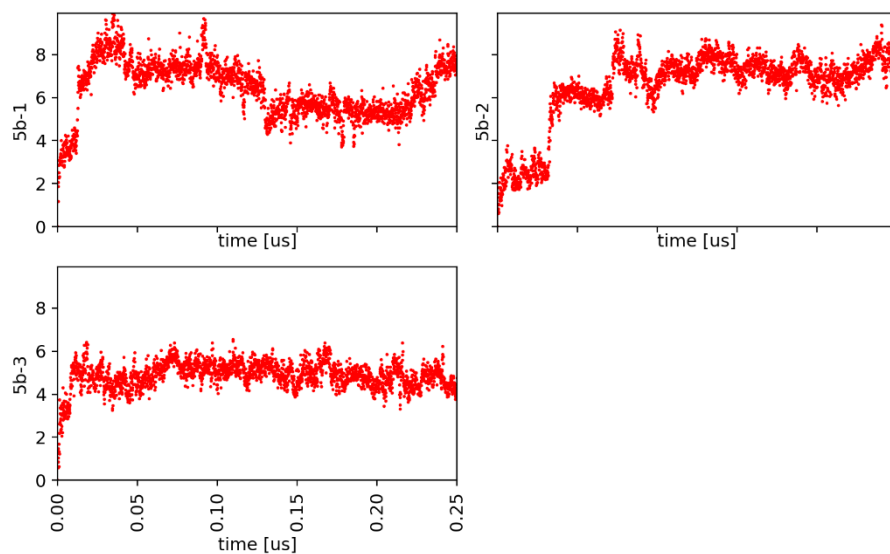

**Figure SM-MOD-26.** RMSD plot of the -Ahx1- (closer to Trp) fragment's position in the simulations of 5b/hNK1R complexes.

*RMSD is given in Angstroms.*

**-Ahx2- (N-terminal) fragment's position**

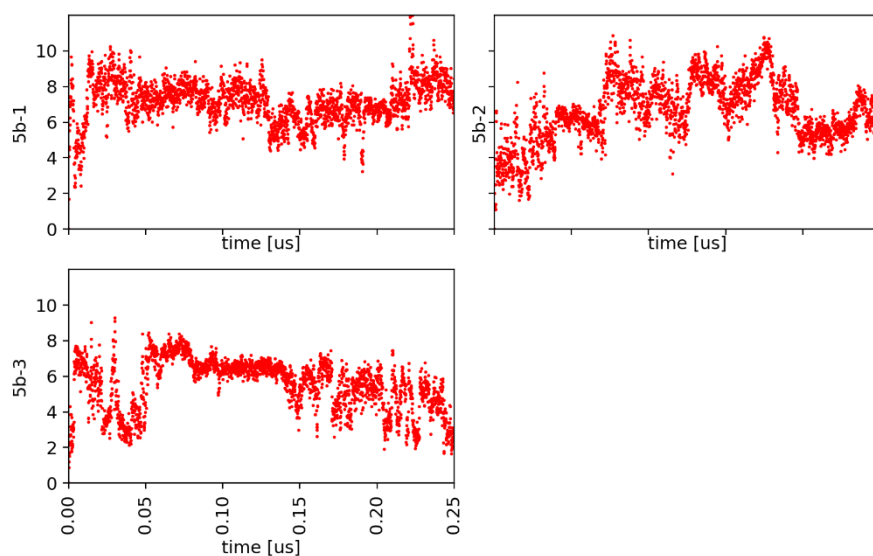

**Figure SM-MOD-27.** RMSD plot of the -Ahx2- (N-terminal) fragment's position in the simulations of 5b/hNK1R complexes.

*RMSD is given in Angstroms.*

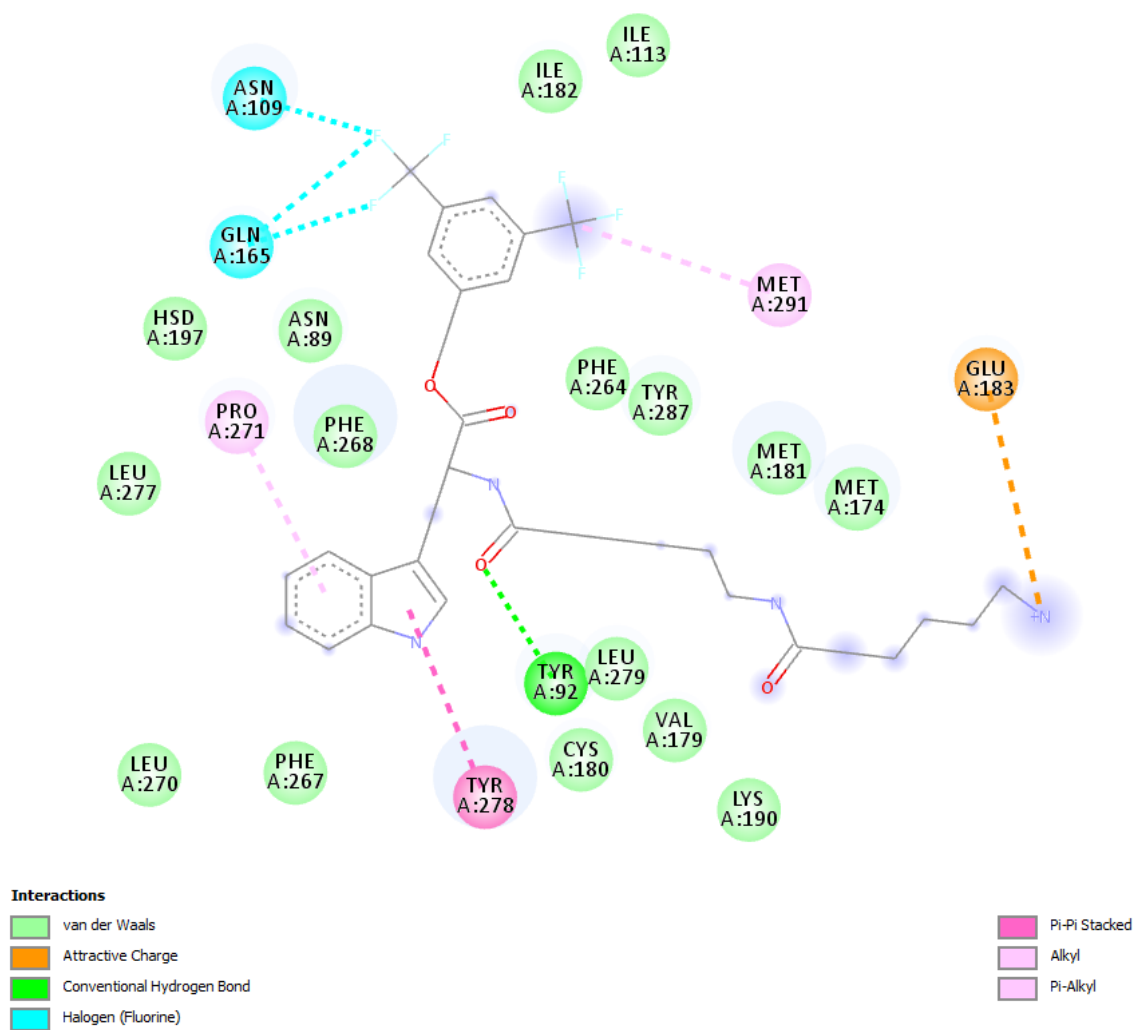

**Figure SM-MOD-28.** Scheme of the interactions of **5b** with the NK1R as found in the MD simulations (simulation **5b-1**, T = 250.0 ns). The interaction types are shown by colours as described in the legend.

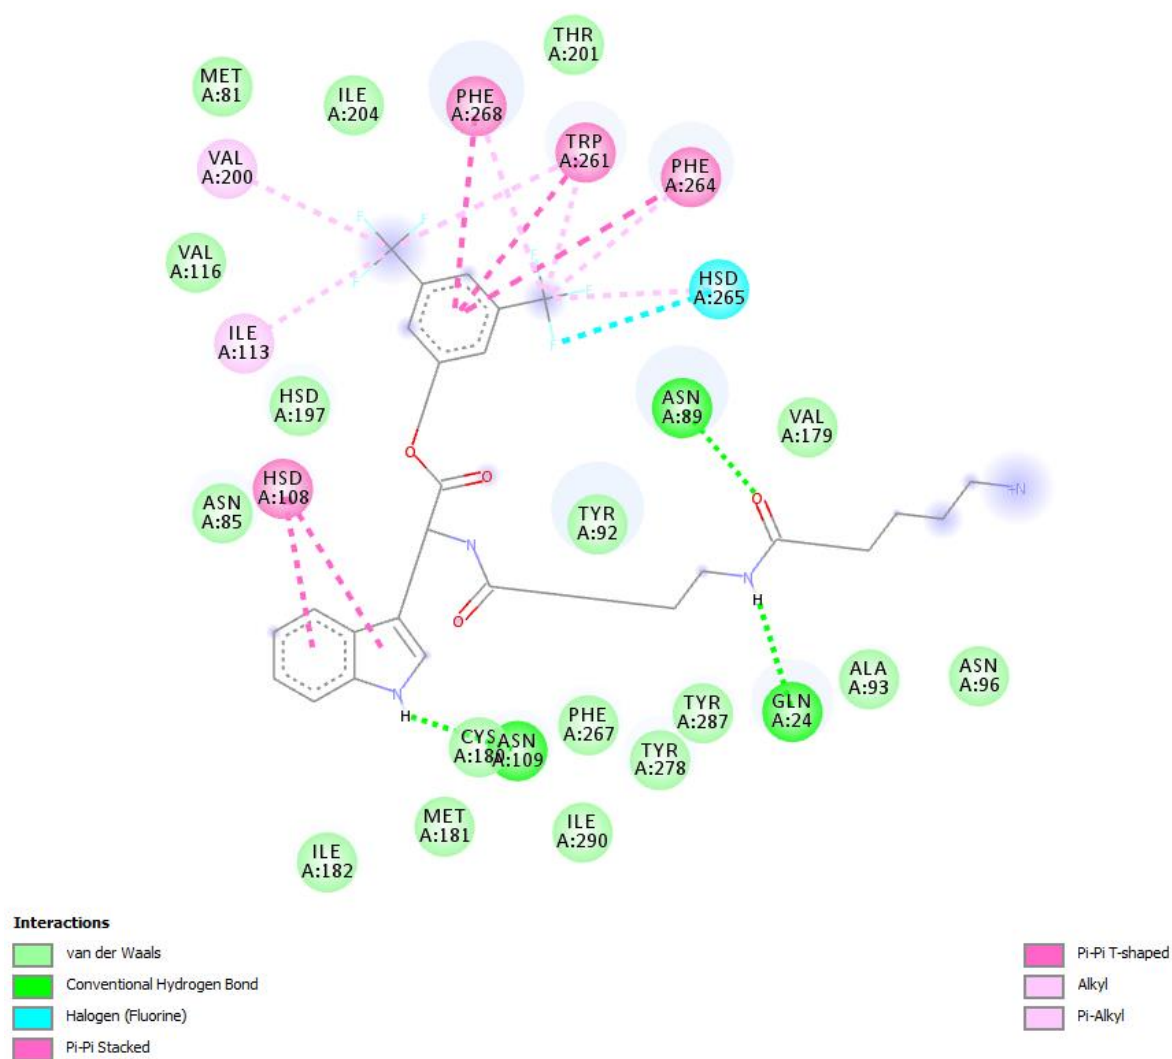

**Figure SM-MOD-29.** Scheme of the interactions of **5b** with the NK1R as found in the MD simulations (simulation **5b-2**, T = 250.0 ns). The interaction types are shown by colours as described in the legend.

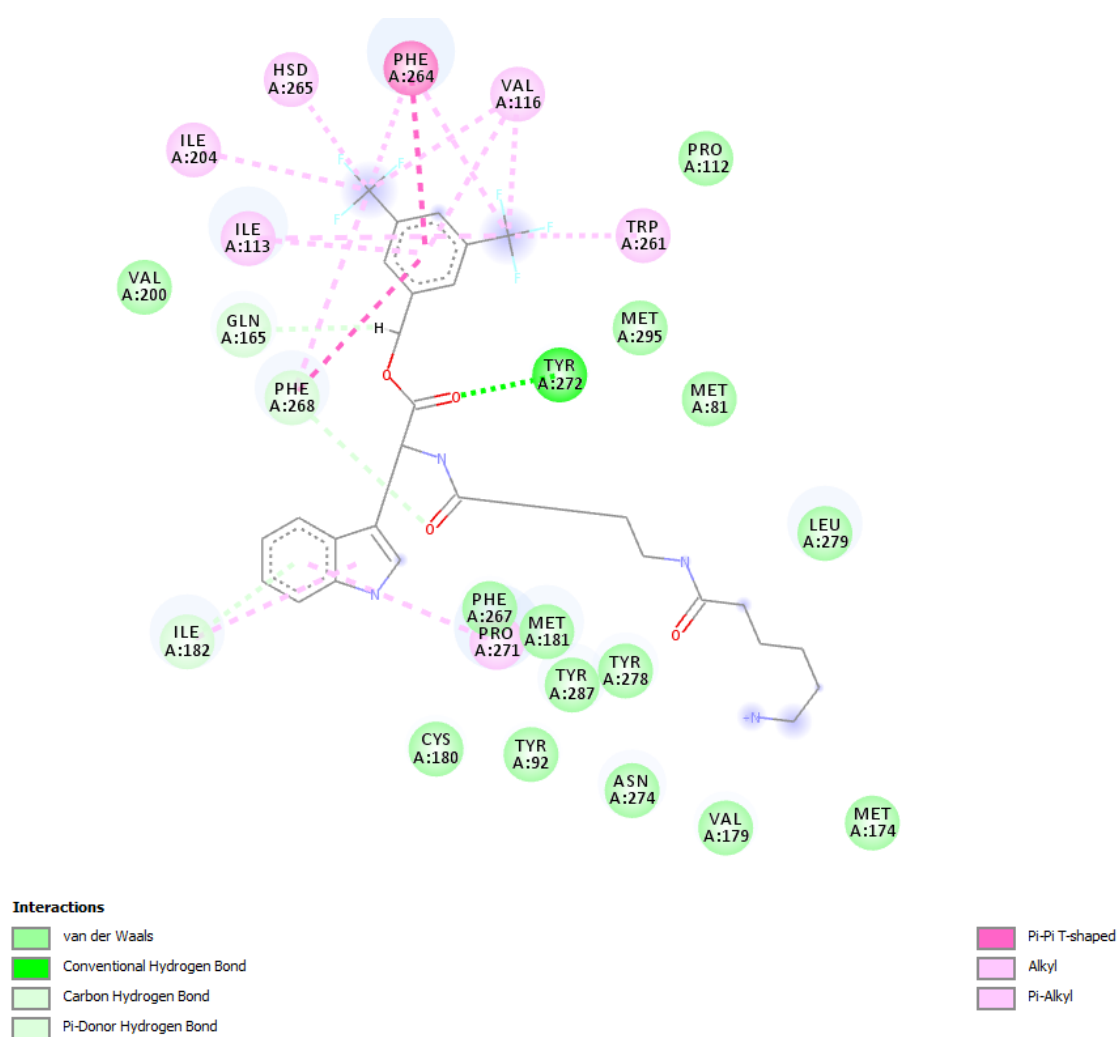

**Figure SM-MOD-30.** Scheme of the interactions of **5b** with the NK1R as found in the MD simulations (simulation **5b-3**, T = 250.0 ns). The interaction types are shown by colours as described in the legend.

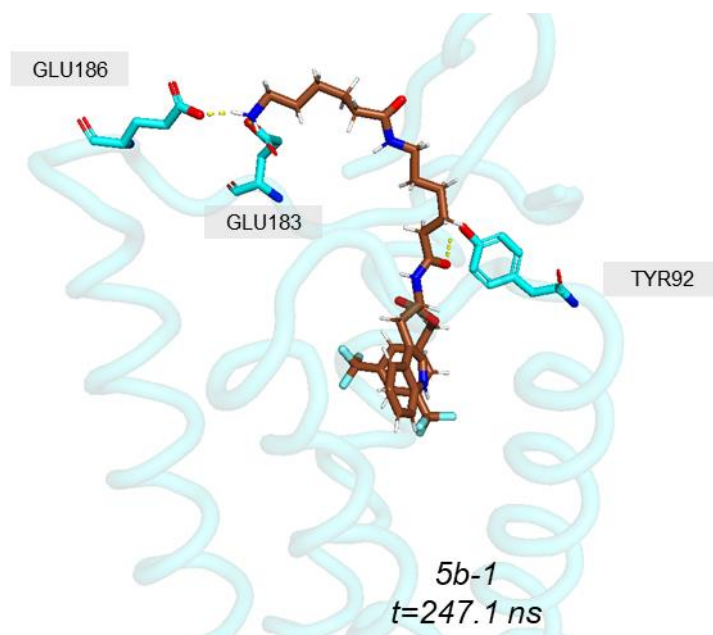

**Figure SM-MOD-31.** Compound **5b** (brown) in the hNK1R binding pocket. A snapshot from 5b-1 MD simulation (t=247.1 ns). The receptor (light blue) displayed in a simplified manner (only several helices as ribbons and only several interacting residues as sticks).

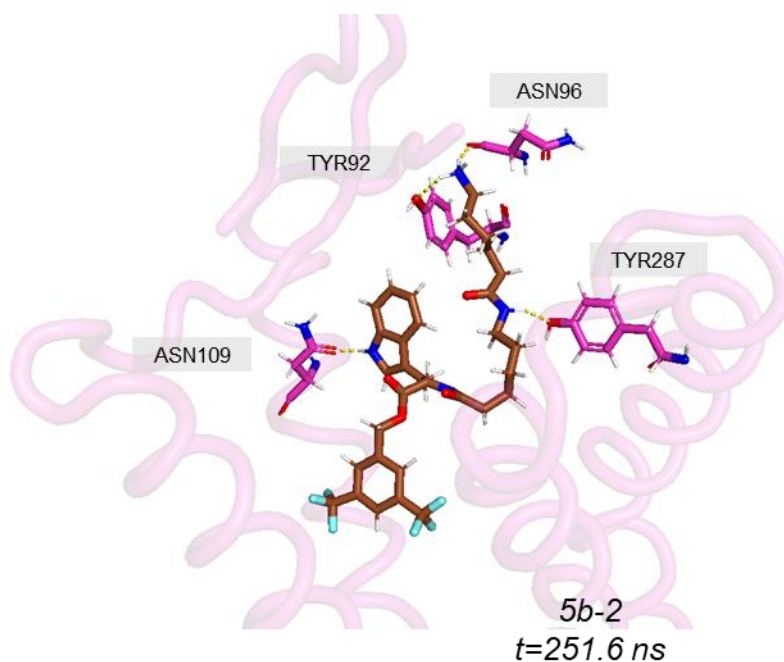

**Figure SM-MOD-32.** Compound **5b** (brown) in the hNK1R binding pocket. A snapshot from 5b-2 MD simulation (t=251.6 ns). The receptor (pink) displayed in a simplified manner (only several helices as ribbons and only several interacting residues as sticks).

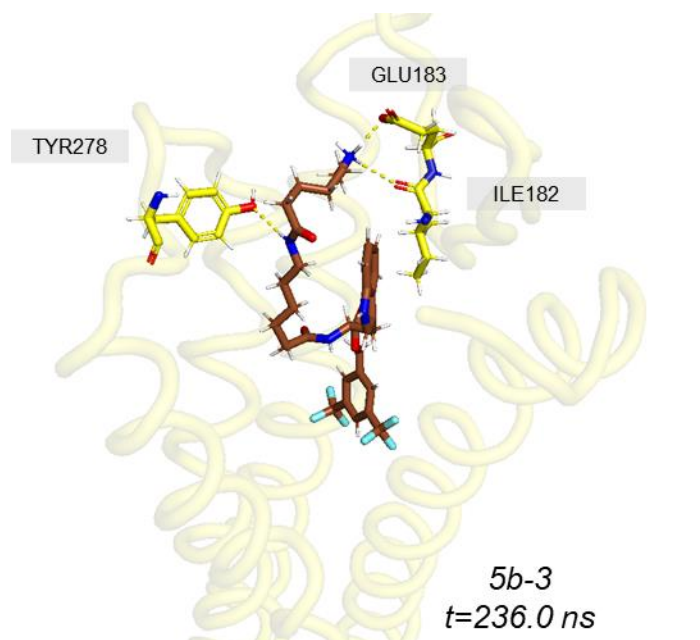

**Figure SM-MOD-33.** Compound **5b** (brown) in the hNK1R binding pocket. A snapshot from 5b-3 MD simulation (t=236.0 ns). The receptor (yellow) displayed in a simplified manner (only several helices as ribbons and only several interacting residues as sticks).
